# Supplementary material
Source: publisher figshare collection journal article supplement (https://acs.figshare.com/ndownloader/files/4447684)
Supplement: Supplementary file 1 [file 4447684]

## Supporting Information

### Stable iron carbide nanoparticle dispersions in [Emim][SCN] and [Emim][N(CN)<sub>2</sub>] ionic liquids

Varsha Khare,<sup>1,2</sup> Alexander Kraupner,<sup>2</sup> Alexandre Manton,<sup>3</sup> Aleksandra Jeličić,<sup>2</sup> Andreas F. Thünemann,<sup>3</sup> Cristina Giordano<sup>2,\*</sup> and Andreas Taubert<sup>1,2,\*</sup>

Institute of Chemistry, University of Potsdam, D-14476 Golm, Germany, Max-Planck-Institute of Colloids and Interfaces, D-14476 Golm, Germany, and BAM Federal Institute for Materials Research and Testing, D-12489 Berlin, Germany.

\* Corresponding author: C.G., MPI of Colloids and Interfaces, Am Mühlenberg 1, D-14476 Potsdam, Tel. 0049 (0)331 567 9509, Email: cristina.giordano@mpikg.mpg.de.

\* Corresponding author: A.T., Institute of Chemistry, University of Potsdam, Karl-Liebknecht-Str. 24-25, D-14476 Potsdam, Tel. 0049 (0)331 977 5773, Email: ataubert@uni-potsdam.de.

1 University of Potsdam

2 Max-Planck-Institute of Colloids and Interfaces

3 BAM Federal Institute for Materials Research and Testing

## Experimental

**Materials.** FeCl<sub>2</sub>\*4H<sub>2</sub>O (Sigma Aldrich), Fe(CO)<sub>5</sub> (Acros Organics), Urea (Riedel-de Haen, 99 %), absolute ethanol (VWR Prolabo), and anhydrous FeCl<sub>3</sub> (Aldrich) were used as received. Ionic Liquids (ILs) based on the 1-ethyl-3-methylimidazolium [Emim] and the 1-

butyl-3-methylimidazolium [Bmim] cation and the ethylsulfate [ES], methanesulfonate [MS], trifluoromethylsulfonate (triflate) [TfO], tetrafluoroborate [BF<sub>4</sub>], dicyanamide [N(CN)<sub>2</sub>], and thiocyanate [SCN] were purchased from Iolitec and used as received. All ILs were colorless or slightly yellow. All ILs were checked for purity via NMR, IR, and elemental analysis prior to use.

**Iron carbide nanoparticle synthesis.** In a typical synthesis, 0.244 g of FeCl<sub>2</sub>\*4H<sub>2</sub>O were mixed with 0.118 g of Fe(CO)<sub>5</sub> and then dissolved in 1 g of absolute ethanol. Urea was added to the iron precursor solution such that the urea/iron chloride molar ratio was equal to 3:1. After stirring for 1h, a dark brown gel was obtained, which was subsequently treated at 700 °C under nitrogen flow for 2 hours. The resulting black magnetic (when an external field is applied) powder consists of crystalline Fe<sub>3</sub>C nanoparticles with diameters between 5 and 10 nm dispersed in a matrix of amorphous carbon. The final material still contains between 10 and 15 % carbon, which cannot be removed.

**Dispersion of nanoparticles in ILs.** Iron carbide nanopowders were dispersed in ILs at various temperatures. In a typical dispersion experiment, 1 to 10 mg of iron carbide nanopowder were mixed with 1 g of IL at room temperature and subsequently stirred at 20, 120, 160, or 180 °C for 72 hours. In some cases, only incomplete dispersion of the iron carbide powder was observed even after 72 hours. Solid residuals were removed by decantation.

**X-ray scattering.** Wide-Angle X-ray scattering (WAXS) was done on a Bruker D8 using CuK $\alpha$  ( $\lambda$  = 1.542 Å) radiation. Silicon was used as external calibration standard, 2D data were converted to 1D data, and analyzed with Diffrac Plus EVA.<sup>1</sup> Small angle X-ray scattering (SAXS) measurements were performed with a SAXSess camera (Anton Paar, Austria) attached to a laboratory X-ray generator (PW3830, PANanalytical) operated with a fine focus glass X-ray tube at 40 kV and 50 mA (CuK $\alpha$ ,  $\lambda$  = 0.1542 nm). Samples were filled in a reusable vacuum tight 1 mm quartz capillary to attain the same scattering volume and

background contribution. The scattering vector is defined in terms of the scattering angle  $\theta$  and the wavelength of the radiation, thus  $q = 4\pi/\lambda \sin(\theta)$ . SAXS data were recorded as 120 x 5 s repetitions in a  $q$ -range from 0.06 nm<sup>-1</sup> to 1.0 nm<sup>-1</sup> with a CCD detection system (Anton Paar). The two-dimensional intensity data were converted to one-dimensional data and deconvoluted using the software SAXSQuant (Anton Paar). Data were fitted using an analytical model<sup>2</sup> assuming a Schultz distribution<sup>3, 4</sup> of the radii, using Igor Pro 6.0.4 (Wavemetrics) and the NIST SANS Data Analysis Package.<sup>5</sup>

**Electron microscopy.** Transmission electron microscopy (TEM) was done on a Philips CM10 operated at 100 kV and a Zeiss 912Ω operated at 120 kV. The nanoparticle dispersions were directly deposited on formvar-coated grids as neat samples in IL and allowed to air-dry for 24 hrs prior to imaging.

**UV/Vis spectroscopy.** UV/Vis spectroscopy was done at room temperature on a Perkin Elmer Lambda Agilent spectrometer from 200 to 1000 nm with a resolution of 3 nm. Experiments were done in standard quartz cuvettes (Hellma) with an optical path length of 1 cm. Undiluted samples were used for all measurements and the respective ionic liquids were used for baseline correction. FeCl<sub>3</sub> solutions used for comparison experiments were made by dissolving a few crystals of FeCl<sub>3</sub> in [Emim][SCN].

**Table S1.** Physico-chemical parameters typically used in the explanation of phenomena in ILs. MW = molecular weight, T<sub>m</sub> = melting temperature, R.I. = refractive index, DK = dielectric constant. Unless given otherwise, values are for 25 °C.

| Cation | Anion | MW g/mol           | Viscosity cP                                   | Density g/cm <sup>3</sup>                                 | T <sub>m</sub> °C | Hydrophilicity | Decomposition Temperature °C | Electr. Conductivity μS/cm                      | DK                |
|--------|-------|--------------------|------------------------------------------------|-----------------------------------------------------------|-------------------|----------------|------------------------------|-------------------------------------------------|-------------------|
| EMIM   | [ES]  | 236.2 <sup>9</sup> | 122 RT) <sup>6</sup><br>14 (80°C) <sup>6</sup> | 1.2369 <sup>3</sup><br>(25°C) <sup>7</sup><br>1.20 (80°C) | 65 <sup>8</sup>   | hydrophilic    | 300 <sup>9</sup>             | 2970 <sup>9</sup><br>7200 (80 °C) <sup>10</sup> | 27.9 <sup>1</sup> |

|      |                       |                    |                                                                          |                                                            |                                     |                           |                      |                                         |                                |
|------|-----------------------|--------------------|--------------------------------------------------------------------------|------------------------------------------------------------|-------------------------------------|---------------------------|----------------------|-----------------------------------------|--------------------------------|
|      | [MS]                  | 206.2 <sub>7</sub> | 109 (RT) <sub>6</sub><br>13<br>(80°C) <sub>6</sub>                       | 1.24 (RT) <sub>6</sub><br>1.21 (80°C) <sub>6</sub>         | 35 <sup>6</sup>                     | hydrophilic               | 250 <sup>9</sup>     | 2700 <sup>9</sup><br>2600 <sup>10</sup> |                                |
|      | [TfO]                 | 260.2 <sub>3</sub> | 53 <sup>8</sup> 45 <sup>12</sup>                                         | 1.330 <sup>8</sup><br>1.3572 <sub>3</sub> <sup>1</sup>     | -9 <sup>12</sup>                    | hydrophilic               | 250 <sup>9</sup>     | 9200 <sup>9</sup>                       | 15.1 <sub>1</sub> <sup>1</sup> |
|      | [BF <sub>4</sub> ]    | 197.9 <sub>7</sub> | 37.7 <sup>14</sup>                                                       | 1.2695 <sub>5</sub> <sup>1</sup>                           | -65 <sub>5</sub> <sup>1</sup>       | hydrophobic               | 150 <sup>15</sup>    | 3150 <sup>9</sup>                       |                                |
|      | [N(CN) <sub>2</sub> ] | 177.2 <sub>1</sub> | 16.8 <sup>9</sup>                                                        | 1.113 <sup>16</sup>                                        | -21 <sup>9</sup>                    |                           | 80 <sup>9</sup>      | 25300 <sup>9</sup>                      |                                |
|      | [SCN]                 | 169.2 <sub>5</sub> | 21 <sup>17</sup><br>24.7 (80°C) <sub>9</sub><br>5.8 (80°C) <sub>10</sub> | 1.1140 (RT) <sub>15</sub><br>1.0829 (80°C) <sub>10</sub>   | -24 <sup>9</sup>                    | Hydrophilic <sup>9</sup>  | 80 <sup>9</sup>      | 2700000 <sup>17</sup>                   |                                |
| BMIM | [ES]                  | 236.2 <sub>9</sub> | 240 <sup>15</sup>                                                        |                                                            | -17 <sub>5</sub> <sup>1</sup>       | hydrophilic               |                      | 8300 <sup>15</sup>                      |                                |
|      | [MS]                  | 234.3 <sub>2</sub> | 15.7 (100°C) <sub>15</sub>                                               | 1.128 (100°C) <sub>15</sub>                                | 75<br>-80 <sub>5</sub> <sup>1</sup> |                           |                      | 210 (80°C) <sub>10</sub>                |                                |
|      | [TfO]                 | 302.3 <sub>4</sub> | 109.0 <sup>9</sup>                                                       | 1.292 (20°C)                                               | 16 <sup>9</sup>                     |                           | 250 <sup>9</sup>     | 3049 <sup>9</sup>                       |                                |
|      | [BF <sub>4</sub> ]    | 226.0 <sub>2</sub> | 233 <sup>18</sup><br>136.7 <sup>9</sup>                                  | 1.1961 (20°C) <sub>15</sub>                                | -75 <sup>9</sup>                    | hydrophobic               | 100 <sup>9</sup>     | 3145 <sup>9</sup>                       |                                |
|      | [N(CN) <sub>2</sub> ] | 205.2 <sub>6</sub> |                                                                          | 1.06 <sup>16</sup>                                         |                                     |                           |                      |                                         |                                |
|      | [SCN]                 | 197.3              | 51.7 <sup>15</sup><br>9.34 (80°C) <sub>10</sub>                          | 1.0696 (25°C) <sub>15</sub><br>1.0384 (80°C) <sub>10</sub> | -24 <sub>5</sub> <sup>1</sup>       | Hydrophilic <sup>10</sup> | 100 °C <sup>15</sup> | 40 <sup>10</sup>                        |                                |

## References

- (1) <http://www.bruker-axs.de/eva.html>. (Jan. 11, 2010),
- (2) Pontoni, D.; Finet, S.; Narayanan, T.; Rennie, A. R., *J. Chem. Phys.* **2003**, 119, 6157.
- (3) Kotlarchyk, M.; Chen, S. H., *J. Chem. Phys.* **1983**, 79, 2461.
- (4) Schulz, G. V., *Z. Phys. Chem. Abt. B* **1935**, 30, 379.
- (5) Kline, S. R., *J. Appl. Crystallogr.* **2006**, 39, 895.
- (6) <http://www.ilco-chemie.de/downloads/Ionic%20Liquid.pdf>. (Nov. 4, 2009),
- (7) Domanska, U.; Laskowska, M., *J. Solution Chem.* **2008**, 37, 1271.
- (8) *Ionic liquids in synthesis*. 2nd ed.; Wiley-VCH: Weinheim, 2007.
- (9) <http://www.carl-roth.de>. (12 Jan. 2010),
- (10) <http://www.basionics.com/en/ionic-liquids/products/>. (12 Jan. 2010),

- (11) Weingärtner, H., *Z. Phys. Chem.* **2006**, 220, 1395.
- (12) Bonhote, P.; Dias, A. P.; Papageorgiou, N.; Kalyansundaram, K.; Grätzel, M., *Inorg. Chem.* **1996**, 35, 1168.
- (13) Kilaru, P. K., *Ind. Eng. Chem. Res.* **2008**, 47, (3), 900.
- (14) Sato, T.; Masuda, G.; Takagi, K., *Electrochim. Acta* **2004**, 49, 3603.
- (15) [www.basf.de](http://www.basf.de). (12 Jan. 2010),
- (16) [merck.com](http://merck.com). (12 Jan. 2010),
- (17) Sun, G.-H.; Li, K.-X.; Sun, C.-G., *J. Power Sources* **2006**, 162, 1444.
- (18) Jin, Y.; Cao, Y.; Yang, J., *J. Liao Ning Univ.* **2004**, 31, 97.
